# Supplementary material for: Effects of NO 2 and C 3 H 6 on the heterogeneous oxidation of SO 2 on TiO 2 in the presence or absence of UV–Vis irradiation
Source: Copernicus journal article supplement (doi:10.5194/acp-19-14777-2019), 2019-12-09
Supplement: Supplementary file 1 [file acp-19-14777-2019-supplement.pdf]

Supplement of Atmos. Chem. Phys., 19, 14777–14790, 2019  
<https://doi.org/10.5194/acp-19-14777-2019-supplement>  
© Author(s) 2019. This work is distributed under  
the Creative Commons Attribution 4.0 License.

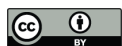

*Supplement of*

## **Effects of $\text{NO}_2$ and $\text{C}_3\text{H}_6$ on the heterogeneous oxidation of $\text{SO}_2$ on $\text{TiO}_2$ in the presence or absence of UV–Vis irradiation**

**Biwu Chu et al.**

*Correspondence to:* Qingxin Ma (qxma@rcees.ac.cn)

The copyright of individual parts of the supplement might differ from the CC BY 4.0 License.

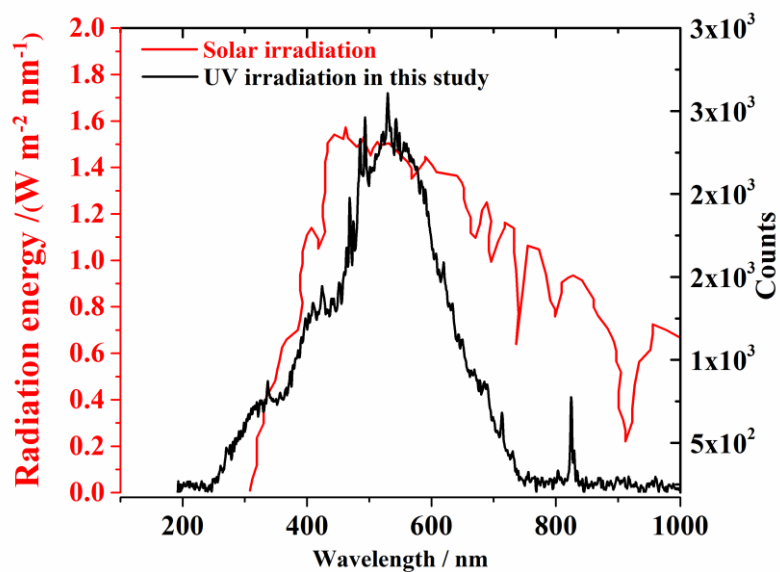

Figure S1: The spectrum of solar irradiation on the earth surface and the spectrum of the UV-Vis irradiation in this study.

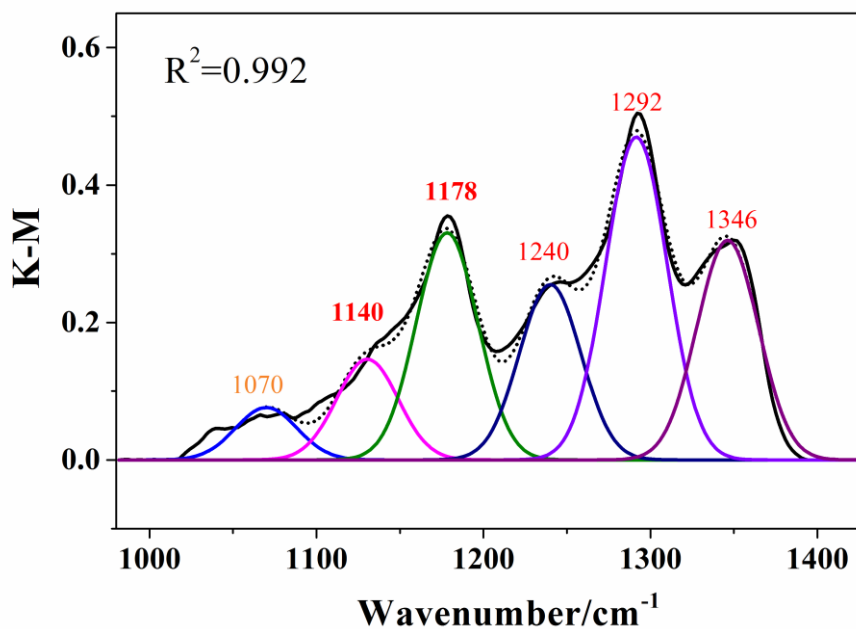

5

Figure S2: Peak fit of DRIFTS spectrum in the range of 1000-1400 cm<sup>-1</sup> for the last spectrum in Figure 1(b).
